# Supplementary material for: Factors associated with SARS-CoV-2-related hospital outcomes among and between persons living with and without diagnosed HIV infection in New York State
Source: PubMed Central journal article supplement (PMC9132290; doi:10.1371/journal.pone.0268978), 2022-05-25
Supplement: pone.0268978.s001.pdf [file pone.0268978.s001.pdf]

**S1 Table. Summary of matching process**

| <b>Criteria for controls, relative to each PLWDH</b> |                     |            |                  |                      | <b>Number selected</b> |                 |
|------------------------------------------------------|---------------------|------------|------------------|----------------------|------------------------|-----------------|
| <b>Level</b>                                         | <b>Sex at birth</b> | <b>Age</b> | <b>Admission</b> | <b>Facility name</b> | <b>PLWDH</b>           | <b>Controls</b> |
| 1                                                    | Exact               | ±5 years   | ±3 days          | Exact                | 849                    | 1,621           |
| 2                                                    | Exact               | ±5 years   | ±7 days          | Exact                | 49                     | 72              |
| 3                                                    | Exact               | ±5 years   | ±14 days         | Exact                | 23                     | 36              |
| 4                                                    | Exact               | ±10 years  | ±14 days         | Exact                | 14                     | 21              |
| <b>Total</b>                                         |                     |            |                  |                      | 935                    | 1,750           |

Abbreviation: PLWDH, persons living with diagnosed HIV.
