# Supplementary material for: Factors associated with SARS-CoV-2-related hospital outcomes among and between persons living with and without diagnosed HIV infection in New York State
Source: PubMed Central journal article supplement (PMC9132290; doi:10.1371/journal.pone.0268978), 2022-05-25
Supplement: pone.0268978.s002.pdf [file pone.0268978.s002.pdf]

**S2 Table. Distribution of COVID-19 treatments among PLWDH and matched controls<sup>a, b, c</sup>**

|                                                      | PLWDH<br>(n = 853) |          | Controls<br>(n = 1,621) |             | <i>Matched P</i> |
|------------------------------------------------------|--------------------|----------|-------------------------|-------------|------------------|
|                                                      | <i>col %</i>       | <i>n</i> | <i>col %</i>            | <i>n</i>    |                  |
| <b>Antibiotics</b>                                   |                    |          |                         |             |                  |
| Erythromycin: Erythrocin, Eryped, Erytab, E-Mycin    | 0.1                | 1/847    | 0.4                     | 7/1,605     | 0.18             |
| Clarithromycin: Biaxin, Biaxin XL                    | 0.2                | 2/846    | 0.1                     | 1/1,605     | 0.21             |
| Azithromycin (Zithromax, Azithromycin, Z-Pack, Zmax) | 55.5               | 471/848  | 60.5                    | 979/1,617   | 0.02             |
| Vancomycin                                           | 30.5               | 258/847  | 28.4                    | 458/1,613   | 0.26             |
| Piperracillin                                        | 15.0               | 127/847  | 4.2                     | 67/1,609    | <0.0001          |
| Ceftriaxone                                          | 46.0               | 390/848  | 50.0                    | 808/1,616   | 0.050            |
| Levofloxacin                                         | 5.3                | 45/847   | 5.2                     | 83/1,606    | 0.82             |
| <b>Specific COVID-19 therapies</b>                   |                    |          |                         |             |                  |
| Remdesivir                                           | 2.8                | 24/847   | 2.3                     | 37/1,605    | 0.50             |
| Hydroxychloroquine                                   | 60.5               | 512/846  | 66.1                    | 1,069/1,618 | 0.02             |
| Chloroquine                                          | 0.8                | 7/847    | 0.1                     | 2/1,606     | 0.02             |
| Tocilizumab                                          | 3.4                | 29/847   | 7.3                     | 117/1,611   | <0.0001          |
| Acetaminophen                                        | 60.8               | 515/847  | 78.6                    | 1,274/1,620 | <0.0001          |
| Convalescent Plasma Therapy                          | 3.5                | 30/847   | 3.2                     | 52/1,606    | 0.87             |
| Dexamethasone                                        | 3.4                | 29/847   | 5.7                     | 91/1,609    | 0.01             |
| Other Steroids                                       | 19.0               | 161/846  | 28.3                    | 456/1,611   | <0.0001          |
| Other COVID-Directed Antiretroviral Therapies        | 0.4                | 3/846    | 2.3                     | 37/1,601    | 0.001            |
| <b>NSAIDS</b>                                        |                    |          |                         |             |                  |
| Aspirin                                              | 19.9               | 169/848  | 21.7                    | 350/1,610   | 0.32             |
| Ibuprofen (Motrin, Advil)                            | 1.3                | 11/847   | 2.1                     | 33/1,607    | 0.19             |
| <b>Other Angiotensin Receptor Blockers</b>           |                    |          |                         |             |                  |
| Cozaar (Losartan)                                    | 3.2                | 27/846   | 4.7                     | 76/1,608    | 0.09             |
| Diovan (valsartan)                                   | 0.4                | 3/846    | 0.6                     | 10/1,608    | 0.34             |
| Prexartan (valsartan)                                | 0.2                | 2/846    | 0.1                     | 2/1,607     | 0.49             |
| <b>ACE Inhibitors</b>                                |                    |          |                         |             |                  |
| Enalapril/Enalaprilat (vasotec oral and injectable)  | 1.9                | 16/846   | 1.1                     | 18/1,607    | 0.17             |
| Lisinopril (Zestril and Prinivil)                    | 4.5                | 38/846   | 4.9                     | 78/1,605    | 0.80             |
| Ramipril (Altace)                                    | 0.1                | 1/846    | 0.3                     | 5/1,607     | 0.36             |

Abbreviations: PLWDH, persons living with diagnosed HIV; NSAIDS, non-steroidal anti-inflammatory drugs; ACE, angiotensin-converting enzyme.

<sup>a</sup> Additional treatments sought in medical records but not found among PLWDH or controls include: Sofosbuvir, Daclatasvir, Diclofenac (Cambia, Cataflam, Voltaren-XR, Zipsor, Zorvolex), Oxaprozin (Daypro), Avapro (irbesartan), Benicar (Olmesartan), Micardis (telmisartan), Teveten (eprosartan), Edarbi (azilsartan medoxomil), Benazepril (Lotensin), Moexipril (Univasc), Fosinopril (Monopril), Perindopril (Aceon), Quinapril (Accupril), Trandolapril (Mavik).

<sup>b</sup> Additional treatments sought in medical records but found only among controls include: Celecoxib (Celebrex) (n=2), Indomethacin (Indocin) (n=1), Naproxen (Aleve, Anaprox, Naprelan, Naprosyn) (n=1), ATACAND (candesartan) (n=1).

<sup>c</sup> Additional treatments sought in medical records but found only among PLWDH include: Piroxicam (Feldene) (n=1), Captopril (Capotne) (n=1).
