# Supplementary material for: Factors associated with SARS-CoV-2-related hospital outcomes among and between persons living with and without diagnosed HIV infection in New York State
Source: PubMed Central journal article supplement (PMC9132290; doi:10.1371/journal.pone.0268978), 2022-05-25
Supplement: pone.0268978.s003.pdf [file pone.0268978.s003.pdf]

**S1 Fig. Flowchart: records available for analysis**

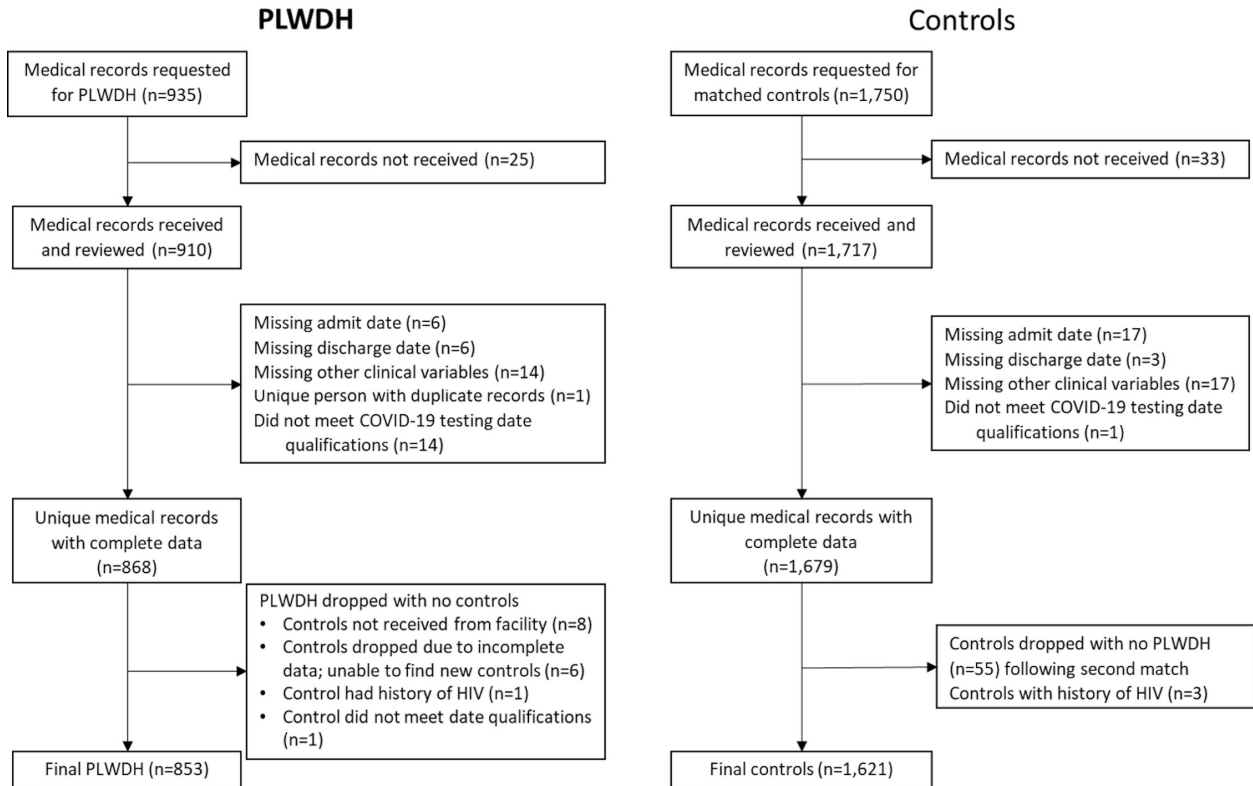

Abbreviations: PLWDH, persons living with diagnosed HIV.
